# Supplementary material for: Functional and comparative analysis of THI1 gene in grasses with a focus on sugarcane
Source: PeerJ journal article supplement (doi:10.7717/peerj.14973), 2023-05-15

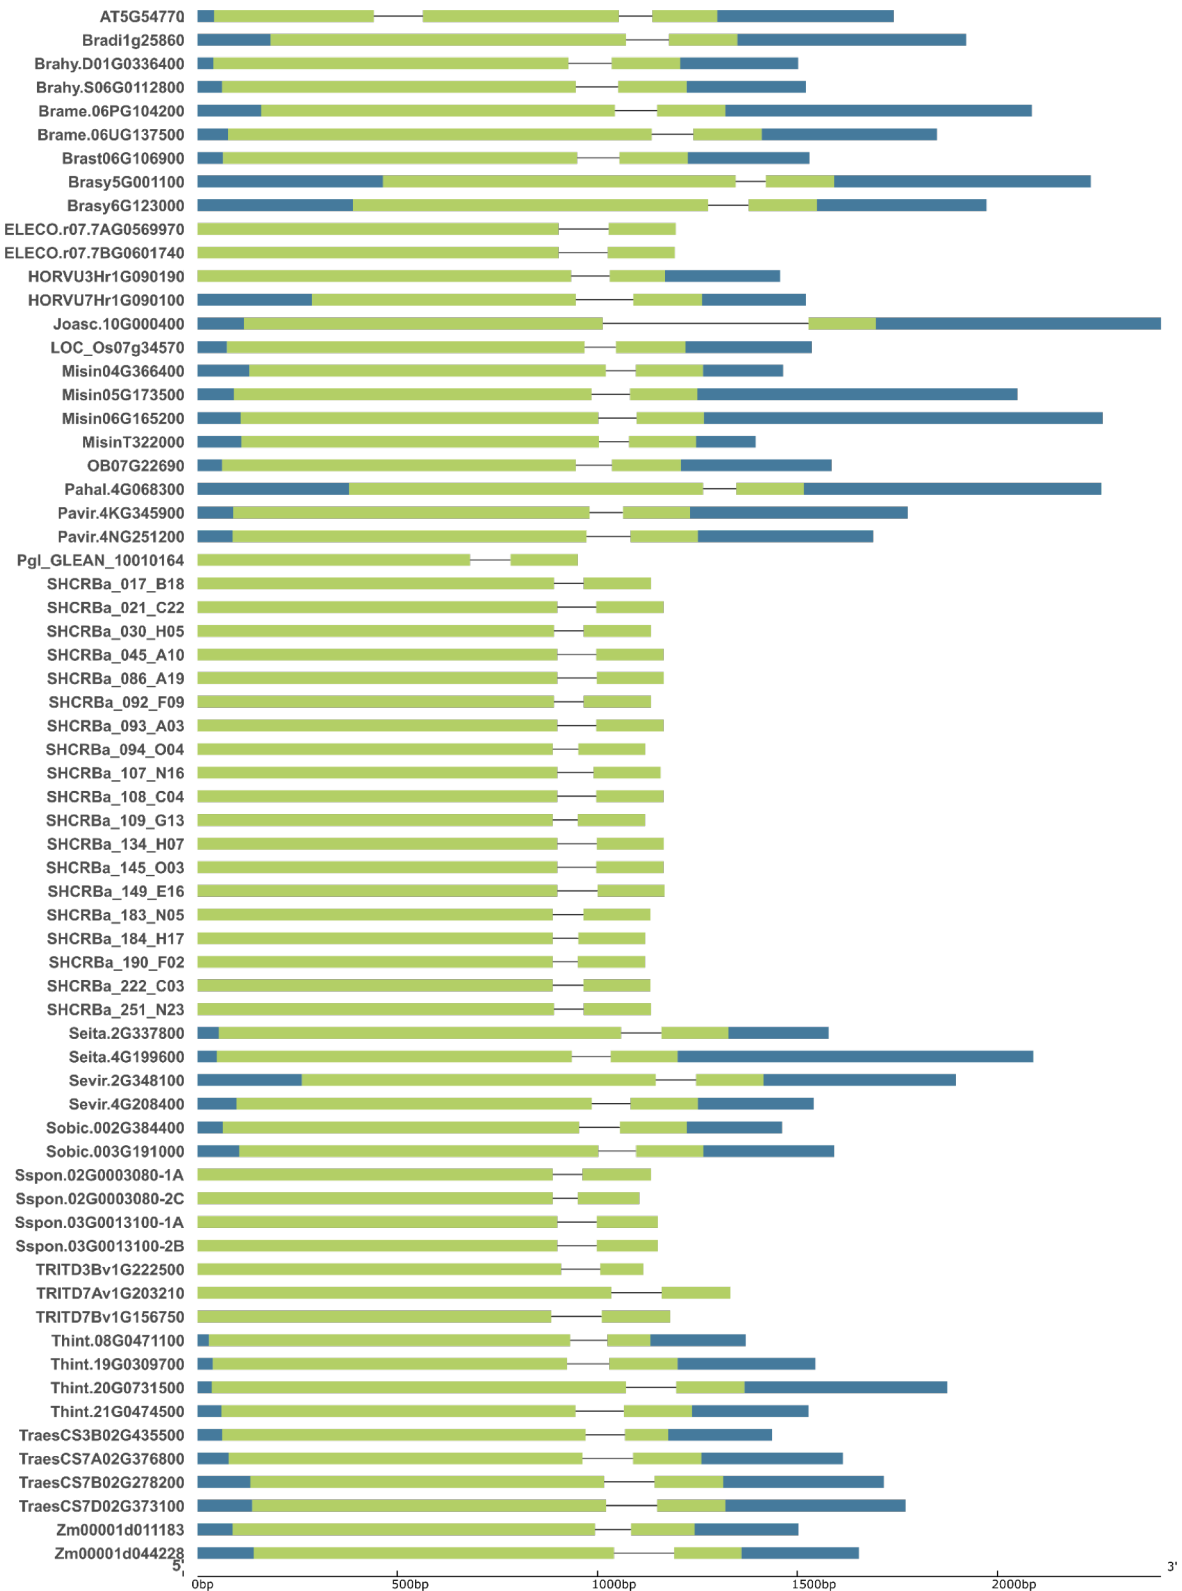

Supplement: FigureS1.pdf [file FigureS1.pdf]
