# Supplementary material for: Functional and comparative analysis of THI1 gene in grasses with a focus on sugarcane
Source: PeerJ journal article supplement (doi:10.7717/peerj.14973), 2023-05-15

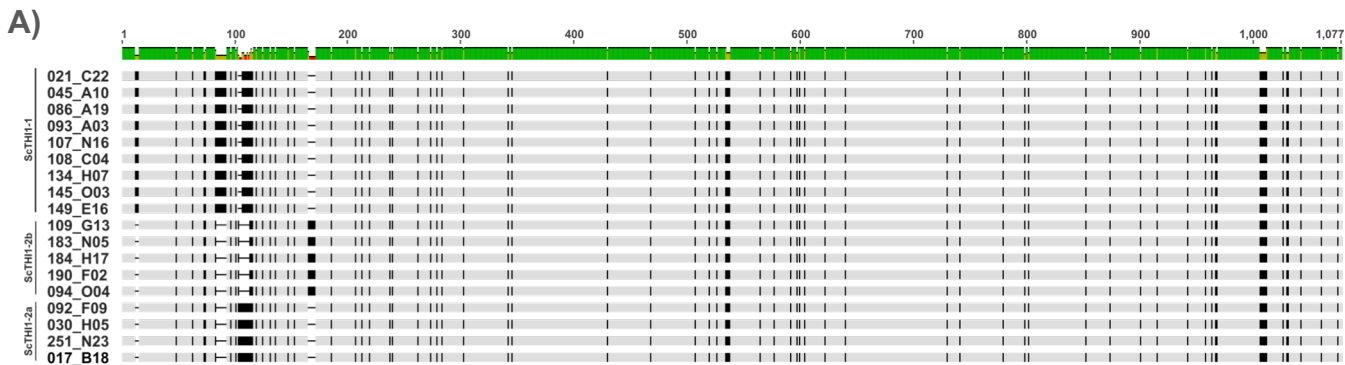

**B)**

|                  |                 |                  |                  |
|------------------|-----------------|------------------|------------------|
| <i>ScTHI1-1</i>  | 100%            |                  |                  |
| <i>ScTHI1-2a</i> | 93.23%          | 100%             |                  |
| <i>ScTHI1-2b</i> | 91.34%          | 98.22%           | 100%             |
| <b>CDS</b>       | <i>ScTHI1-1</i> | <i>ScTHI1-2a</i> | <i>ScTHI1-2b</i> |

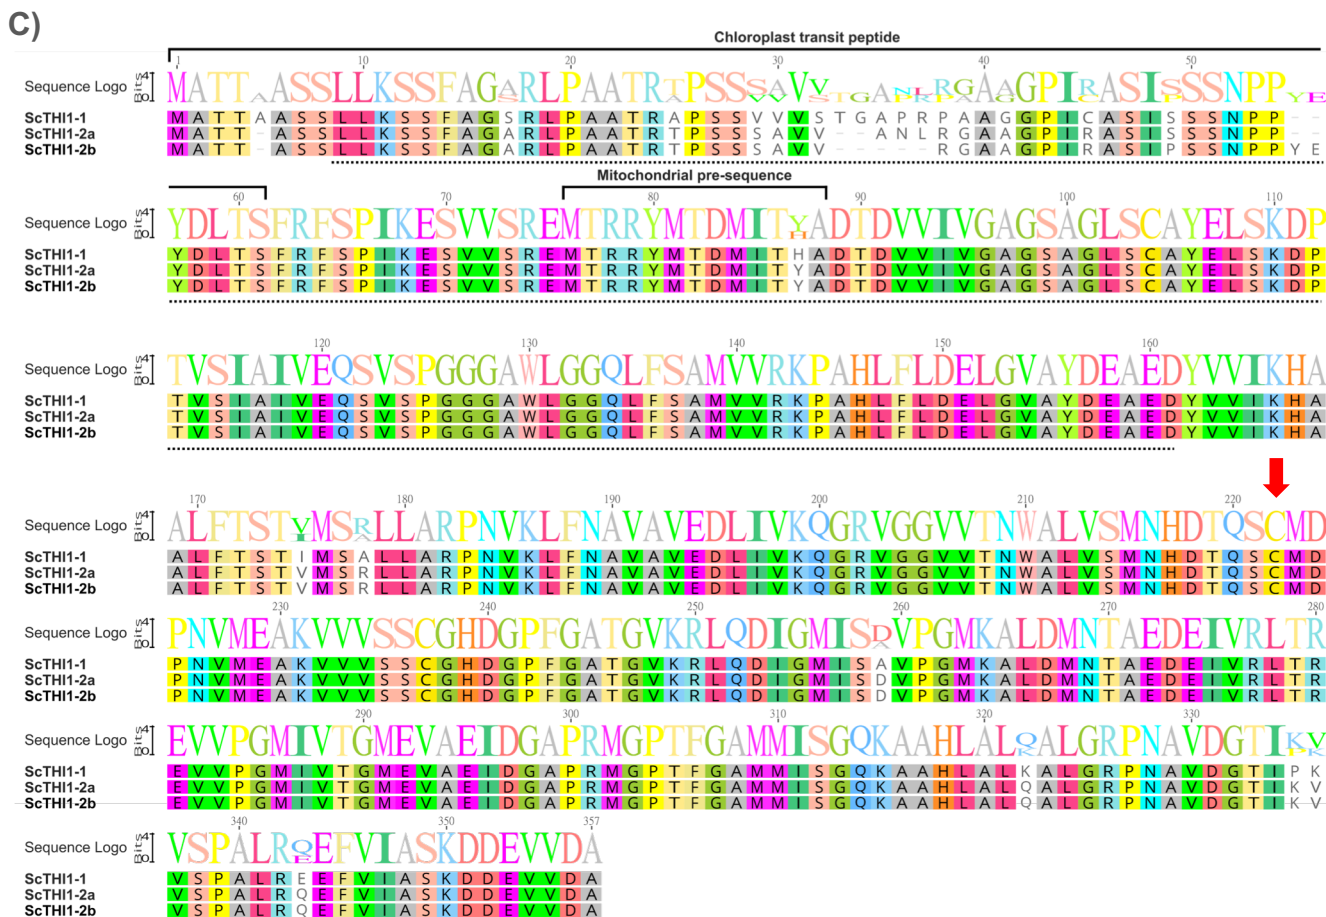

Supplement: FigureS2.pdf [file FigureS2.pdf]
