# Supplementary material for: Functional and comparative analysis of THI1 gene in grasses with a focus on sugarcane
Source: PeerJ. 2023 May 15;11:e14973. doi: 10.7717/peerj.14973 (PMC10194071; doi:10.7717/peerj.14973)
Supplement: Supplemental Information 5 [file peerj-11-14973-s005.xlsx]

## Sheet: Table S3
Table S3. Accession numbers of the sequences used in synteny analysis by species.
Sinteny region	Specie	THI1 homologous	Gene 1	Gene 2	Gene 3	Gene 4	Gene 5	Gene 6	Gene 7	Gene 8	Gene 9	Gene 10	Gene 11	Gene 12	Gene 13	Gene 14	Gene 15	Gene 16	Gene 17	Gene 18
A	Arabidopsis thaliana	AtTHI1	AT5G54680	AT5G54690	AT5G54700	AT5G54710	AT5G54720	AT5G54730	AT5G54740	AtTHI1	AT5G54800	AT5G54810	AT5G54820	AT5G54830	AT5G54840	AT5G54850	AT5G54855	AT5G54860
B	Eleusine coracana	EcTHI1-1	ELECO.r07.7AG0556710.1	ELECO.r07.7AG0569960.1	ELECO.r07.7AG0569990.1	ELECO.r07.7AG0570000.1	ELECO.r07.7AG0570020.1	ELECO.r07.7AG0570050.1	ELECO.r07.7AG0562370.1	ELECO.r07.7AG0562370.1	ELECO.r07.7AG0562370.1
B	Eleusine coracana	EcTHI1-2	ELECO.r07.7BG0587610.1	ELECO.r07.7BG0601730.1	ELECO.r07.7BG0601780.1	ELECO.r07.7BG0601810.1	ELECO.r07.7BG0601820.1	ELECO.r07.7BG0601860.1	ELECO.r07.7BG0601870.1	ELECO.r07.7AG0570000.1
B	Cenchrus americanus	CaTHI1-1	Pgl_GLEAN_10012609	Pgl_GLEAN_10010162	Pgl_GLEAN_10010163	Pgl_GLEAN_10010166	Pgl_GLEAN_10010167	Pgl_GLEAN_10010168	Pgl_GLEAN_10010169	Pgl_GLEAN_10010173	Pgl_GLEAN_10010174	Pgl_GLEAN_10001930	Pgl_GLEAN_10000214	Pgl_GLEAN_10010166	Pgl_GLEAN_10010167
B	Setaria italica	SiTHI1-1	Seita.2G337300	Seita.2G337400	Seita.2G337500	Seita.2G337700	Seita.2G337900	Seita.2G338000	Seita.2G338100	Seita.2G338200	Seita.2G338600	Seita.2G338700	Seita.2G338800	Seita.2G336700	Seita.2G337900	Seita.2G338000
B	Setaria viridis	SvTHI1-1	Sevir.2G347800	Sevir.2G347900	Sevir.2G348000	Sevir.2G348200	Sevir.2G348300	Sevir.2G047100	Sevir.2G348700	Sevir.2G348800	Sevir.2G348900	Sevir.2G347200	Sevir.2G348200	Sevir.2G348300
B	Oryza brachyantha	ObTHI1	OB07G22630	OB07G22700	OB07G22710	OB07G22720	OB07G22730	OB07G22750	OB07G23550	OB07G23560	OB07G22590	OB07G22700	OB07G22710
B	Oryza sativa	OsTHI1	LOC_Os07g07000	LOC_Os07g34520	LOC_Os07g34580	LOC_Os07g34589	LOC_Os07g34598	LOC_Os07g34610	LOC_Os07g34640	LOC_Os07g34390	LOC_Os07g34580	LOC_Os07g34589	LOC_Os07g34620
C	Panicum halli var. hallii	PhTHI1	Pahal.4G068500	Pahal.4G090300	Pahal.4G090300	Pahal.4G068600	Pahal.4G068700	Pahal.1G116300	Pahal.1G116300	Pahal.4G068700
C	Panicum virgatum	PvTHI1-2	Pavir.4KG345700	Pavir.4KG345100	Pavir.4KG345600	Pavir.4KG345400	Pavir.4KG345300	Pavir.4KG345300	Pavir.4KG345400
C	Panicum virgatum	PvTHI1-1	Pavir.4NG251011	Pavir.4NG250500	Pavir.4NG25070	Pavir.4NG250600	Pavir.4NG250500	Pavir.4NG250500	Pavir.4NG250600
C	Cenchrus americanus	CaTHI1-2	Pgl_GLEAN_10038433	Pgl_GLEAN_10003957	Pgl_GLEAN_10003951	Pgl_GLEAN_10003955	Pgl_GLEAN_10003954	Pgl_GLEAN_10003953	Pgl_GLEAN_10023125	Pgl_GLEAN_10003954
C	Setaria viridis	SvTHI1-2	Sevir.4G208700	Sevir.4G208800	Sevir.4G209000	Sevir.4G209100	Sevir.4G209200	Sevir.4G209201	Sevir.4G209400
C	Setaria italica	SiTHI1-2	Seita.4G199800	Seita.4G199900	Seita.4G200100	Seita.4G200200	Seita.4G200300	Seita.4G200400	Seita.4G200600
D	Miscanthus sinensis	MsTHI1-4	MisinT322300	MisinT322200	MisinT322300
D	Miscanthus sinensis	MsTHI1-3	Misin04G367300	Misin04G032000	Misin04G191000	Misin04G366500	Misin04G366700	Misin04G366700	Misin04G365400	Misin04G366200	Misin04G248400	Misin04G366300	Misin04G366200	Misin04G366800	Misin04G366000	Misin04G365900	Misin04G365800	Misin04G365700	Misin04G365600
D	Sorghum bicolor	SbTHI1-2	Sobic.002G139800	Sobic.002G385300	Sobic.002G384700	Sobic.002G385100	Sobic.002G382900	Sobic.002G383500	Sobic.002G383400	Sobic.002G384000	Sobic.002G384200	Sobic.002G265166	Sobic.002G384300	Sobic.002G384200	Sobic.002G385400	Sobic.002G384100	Sobic.002G383900	Sobic.002G383800	Sobic.002G383700	Sobic.002G383600
D	SHCRBa_092_F09	ScTHI1-2	Sspon.02G0046970-1C	Sspon.02G0003000-1A	Sspon.02G0003010-1A	Sspon.02G0003090-1A	Sspon.02G0003010-1P	Sobic.002G384100	Sobic.002G383900	Sobic.002G383800	Sobic.002G383700	Sobic.002G383600
D	SHCRBa_017_B18		Sspon.02G0033720-2C	Sspon.02G0003040-1P	Sspon.02G0003020-2P	Sspon.02G0003060-1A	Sobic.002G385400
D	SHCRBa_030_H05		Sspon.02G0033720-2C	Sspon.02G0003040-1P	Sspon.02G0003020-2P	Sspon.02G0003060-1A	Sobic.002G385400
D	SHCRBa_251_N23		Sspon.02G0033720-2C	Sspon.02G0003040-1P	Sspon.02G0003020-2P	Sspon.02G0003060-1A	Sobic.002G385400
D	SHCRBa_094_O04		Sspon.02G0033720-2C	Sspon.02G0003040-1P	Sspon.02G0003020-2P	Sspon.02G0003060-1A	Sobic.002G385400
D	SHCRBa_109_G13		Sspon.02G0003060-1A	Sspon.02G0003000-1A	Sspon.02G0003010-1A	Sspon.02G0003090-1A	Sspon.02G0003010-1P	Sobic.002G384100	Sobic.002G383900	Sobic.002G383800
D	SHCRBa_184_H17		Sspon.02G0003020-2P	Sspon.02G0003060-1A	Sspon.02G0003000-1A	Sspon.02G0003010-1A	Sspon.02G0003090-1A	Sspon.02G0003010-1P	Sobic.002G384100	Sobic.002G383900	Sobic.002G383800
D	SHCRBa_190_F02		Sspon.02G0003060-1A	Sspon.02G0003000-1A	Sspon.02G0003010-1A	Sspon.02G0003090-1A	Sspon.02G0003010-1P	Sobic.002G384100	Sobic.002G383900	Sobic.002G383800
D	Saccharum spontaneum	SsTHI1-4	Sspon.02G0046920	Sspon.02G0046910	Sspon.02G0033720	Sspon.02G0003040	Sspon.02G0003020	Sspon.02G0003020	Sspon.02G0003060	Sspon.02G0046970	Sspon.02G0046980	Sspon.02G0003010	Sspon.02G0003050	Sspon.02G0003090	Sspon.02G0003010	Sobic.002G385400	Sobic.002G383600
D	Saccharum spontaneum	SsTHI1-3	Sspon.02G0046920	Sspon.02G0033720	Sspon.02G0003040	Sspon.02G0003020	Sspon.02G0003020	Sspon.02G0003060	Sspon.02G0046970	Sspon.02G0003000	Sspon.02G0003010	Sspon.02G0003050	Sspon.02G0003090	Sspon.02G0003010	Sobic.002G385400	Sobic.002G384100	Sobic.002G383900	Sobic.002G383800	Sobic.002G383700	Sobic.002G383600
D	SHCRBa_183_N05	ScTHI1-2	Sspon.02G0003040-1P	Sspon.02G0003020-2P	Sspon.02G0003060-1A	Sspon.02G0003000-1A	Sspon.02G0003010-1A	Sspon.02G0003090-1A	Sspon.02G0003010-1P	Sobic.002G385400	Sobic.002G384100	Sobic.002G383900	Sobic.002G383800
D	SHCRBa_222_C03		Sspon.02G0003040-1P	Sspon.02G0003020-2P	Sspon.02G0003060-1A	Sspon.02G0003000-1A	Sspon.02G0003010-1A	Sspon.02G0003090-1A	Sspon.02G0003010-1P	Sobic.002G384100	Sobic.002G383900	Sobic.002G383800
E	Zea mays	ZmTHI1-1	Zm00001d044226	Zm00001d011178	Zm00001d044225	Zm00001d044237	Zm00001d044237	Zm00001d011179	Zm00001d011179	Zm00001d011174	Zm00001d044243	Zm00001d011189	Zm00001d011187	Zm00001d011177
E	Zea mays	ZmTHI1-2	Zm00001d04422	Zm00001d044245	Zm00001d044224	Zm00001d044232	Zm00001d044225	Zm00001d044237	Zm00001d011179	Zm00001d011174	Zm00001d044230	Zm00001d044243	Zm00001d044227	Zm00001d011189	Zm00001d011187
E	Miscanthus sinensis	MsTHI1-1	Misin05G173800	Misin05G172600	Misin05G174200	Misin05G173100	Misin05G174100	Misin05G173300	Misin05G174000	Misin05G174000	Misin05G174500	Misin05G173400	Misin05G172800	Misin05G173200	Misin05G173600	Misin05G172700	Misin05G173900	Misin05G172900	Misin05G174300
E	Sorghum bicolor	SbTHI1-1	Sobic.003G190800	Sobic.003G192200	Sobic.003G190400	Sobic.003G191700	Sobic.003G190500	Sobic.003G190500	Zm00001d044237	Sobic.003G190600	Sobic.003G190600	Sobic.003G190100	Sobic.003G191400	Sobic.003G192000	Sobic.003G191600	Sobic.003G190900	Sobic.003G192100	Sobic.003G191800	Sobic.003G190200
E	Miscanthus sinensis	MsTHI1-2	Misin05G173800	Misin05G172600	Misin05G174200	Misin05G173100	Misin05G174100	Misin05G174100	Misin05G173300	Misin05G174000	Misin05G174000	Misin05G174500	Misin05G173400	Misin05G172800	Misin05G173200	Misin05G173600	Misin05G172700	Misin05G173900	Misin05G172900	Misin05G174300
E	Saccharum spontaneum	SsTHI1-2	Sspon.03G0013170-2B	Sspon.03G0012960-2B	Sspon.03G0013050-2B	Sspon.03G0013200-2B	Sspon.03G0013200-2B	Sspon.03G0031540-1B	Sspon.03G0031540-1B	Sspon.03G0033200-1B	Sspon.03G0013080-2B	Sspon.03G0012990-2B	Sspon.03G0013160-2B	Sspon.03G0033140-1B	Sspon.03G0033160-1B	Sspon.07G0003110-1P	Sspon.03G0013210-2B
E	Saccharum spontaneum	SsTHI1-1	Sspon.03G0013170-1A	Sspon.03G0012960-1A	Sspon.03G0013190-1A	Sspon.03G0013050-1A	Sspon.03G0013200-1A	Sspon.03G0013200-1A	Sspon.03G0013070-1A	Sspon.03G0004930-1A	Sspon.03G0004930-1A	Sspon.03G0004930-1A	Sspon.03G0013080-1A	Sspon.03G0012990-1A	Sspon.03G0013160-1A	Sspon.03G0004940-1A
E	SHCRBa_149_E16	ScTHI1-1	Misin05G173100	Misin05G173200	Misin05G173300	Misin05G173400	Misin05G173600	Misin05G173800	Misin05G173900	Misin05G174000	Misin05G174100	Misin05G174200
E	SHCRBa_107_N16		Misin05G173100	Misin05G173200	Misin05G173300	Misin05G173400
E	SHCRBa_021_C22		Misin05G173100	Misin05G173200	Misin05G173300	Misin05G173400	Misin05G173600	Misin05G173800
E	SHCRBa_086_A19		Misin05G173100	Misin05G173200	Misin05G173300	Misin05G173400	Misin05G173600	Misin05G173800
E	SHCRBa_134_H07		Misin05G173100	Misin05G173200	Misin05G173300	Misin05G173400	Misin05G173600	Misin05G173800
E	SHCRBa_145_O03		Misin05G173200	Misin05G173300	Misin05G173400	Misin05G173600	Misin05G173800
E	SHCRBa_108_C04		Misin05G173200	Misin05G173300	Misin05G173400	Misin05G173600	Misin05G173800
E	SHCRBa_045_A10		Misin05G173200	Misin05G173300	Misin05G173400	Misin05G173600	Misin05G173800
E	SHCRBa_093_A03		Misin05G173200	Misin05G173300	Misin05G173400	Misin05G173600	Misin05G173800

## Sheet: S3
Clade		Gene reference	Chromossome	Start position	End position	Strand	Specie Synteny	Gene Orthology	Start position	End position	Strand
Clade A	Gene 1	Misin05G172600	Chr05	57825581	57827591	+	Miscanthus sinensis
	Gene 2	Misin05G172700	Chr05	58097123	58097485	+	Zea mays
	Gene 3	Misin05G172800	Chr05	58251890	58257870	+	Sorghum bicolor
	Gene 4	Misin05G172900	Chr05	58295510	58296889	+	Saccharum spontaneum
	Gene 5	Misin05G173100	Chr05	58433219	58435642	+	BACs
	Gene 6	Misin05G173200	Chr05	58447442	58448407	+
	Gene 7	Misin05G173300	Chr05	58451141	58451386	-
	Gene 8	Misin05G173400	Chr05	58455250	58457041	+
	Gene 9	Misin05G173600	Chr05	58570657	58571145	+
	Gene 10	Misin05G173800	Chr05	58674613	58677132	+
	Gene 11	Misin05G173900	Chr05	58791197	58792423	-
	Gene 12	Misin05G174000	Chr05	58800708	58804773	-
	Gene 13	Misin05G174100	Chr05	58824363	58829870	+
	Gene 14	Misin05G174200	Chr05	58831268	58834665	+
	Gene 15	Misin05G174300	Chr05	58940035	58948838	+
	Gene 16	Misin05G174500	Chr05	58986621	58990932	-
	Gene 17	Sspon.03G0013180-2B	Chr03	46304362	46304369	-
Clade B	Gene 18	Sspon.02G0046920-1C	Chr02	9070407	9078678	-	Sacchaum spontaneum
	Gene 19	Sspon.02G0046910-1P	Chr02	9070465	9074516	+	BACs
	Gene 20	Sspon.02G0033720-2C	Chr02	9124601	9125786	+	Miscanthus sinensis
	Gene 21	Sspon.02G0003040-1P	Chr02	9171272	9173428	+	Sorghum bicolor
	Gene 22	Sspon.02G0003020-2P	Chr02	9175853	9178470	+
	Gene 23	Sspon.02G0003020-1P	Chr02	10045342	10045644	+
	Gene 24	Sspon.02G0003060-1A	Chr02	10111647	10112048	+
	Gene 25	Sspon.02G0046970-1C	Chr02	9732416	9733643	-
	Gene 26	Sspon.02G0046980-1P	Chr02	9737493	9738863	+
	Gene 28	Sspon.02G0003000-1A	Chr02	10025786	10026280	-
	Gene 29	Sspon.02G0003010-1A	Chr02	10039472	10041925	-
	Gene 30	Sspon.02G0003050-1A	Chr02	10099801	10100473	+
	Gene 31	Sspon.02G0003090-1A	Chr02	10127443	10137947	+
	Gene 32	Sspon.02G0003010-1P	Chr02	10138326	10141674	+
	Gene 34	Sobic.002G385400	Chr02	74006901	74009694	-
	Gene 35	Sobic.002G384100	Chr02	73946693	73947263	+
	Gene 36	Sobic.002G383900	Chr02	73937660	73940092	+
	Gene 37	Sobic.002G383800	Chr02	73931275	73935787	+
	Gene 38	Sobic.002G383700	Chr02	73925232	73930261	+
	Gene 39	Sobic.002G383600	Chr02	73916755	73923871	+
Clade C	Gene 40	Seita.2G337300	scaffold_2	42149654	42150979	-	Setaria italica
	Gene 41	Seita.2G337400	scaffold_2	42152822	42155254	+	Setaria viridis
	Gene 42	Seita.2G337500	scaffold_2	42156090	42157138	+	Cenchrus americanus
	Gene 43	Seita.2G337700	scaffold_2	42167519	42169465	-
	Gene 44	Seita.2G337900	scaffold_2	42184183	42186013	+
	Gene 45	Seita.2G338000	scaffold_2	42196833	42197465	-
	Gene 46	Seita.2G338100	scaffold_2	42201515	42204324	-
	Gene 47	Seita.2G338200	scaffold_2	42208043	42208477	+
	Gene 48	Seita.2G338600	scaffold_2	42218505	42222561	+
	Gene 49	Seita.2G338700	scaffold_2	42223266	42225380	-
	Gene 50	Seita.2G338800	scaffold_2	42233584	42233584	-
	Gene 52	Seita.4G199800	scaffold_4	31847839	31850811	+	Setaria otalica
	Gene 53	Seita.4G199900	scaffold_4	31851405	31852397	+	Setaria viridis
	Gene 54	Seita.4G200100	scaffold_4	31872826	31887569	+	Cenchrus americanus
	Gene 55	Seita.4G200200	scaffold_4	31889179	31891615	+
	Gene 56	Seita.4G200300	scaffold_4	31892203	31893231	-
	Gene 57	Seita.4G200400	scaffold_4	31896685	31897341	+
	Gene 58	Seita.4G200600	scaffold_4	31903171	31903830	+
	Gene 60	LOC_Os07g34390	Chr7	20615767	20620597	+	Panicum virgatum
	Gene 61	LOC_Os07g34580	Chr7	20729526	20731017	+	Panicum hallii var. hallii
	Gene 62	LOC_Os07g34589	Chr7	20733462	20734091	-	Eleusine coracana
	Gene 63	LOC_Os07g34620	Chr7	20752357	20754398	-	Oropetium thomameum
	Gene 64						Oryza sativa
	Gene 65						Oryza brachyantha

## Sheet: S3-1
Clade	Gene reference	Chromossome	Start position	End position	Strand	Specie Synteny	Gene Orthology	Start position	End position	Strand
Clade A	Misin05G172600	Chr05	57825581	57827591	+	Zea mays
	Misin05G172700	Chr05	58097123	58097485	+
	Misin05G172800	Chr05	58251890	58257870	+
	Misin05G172900	Chr05	58295510	58296889	+
	Misin05G173100	Chr05	58433219	58435642	+
	Misin05G173200	Chr05	58447442	58448407	+
	Misin05G173300	Chr05	58451141	58451386	-
	Misin05G173400	Chr05	58455250	58457041	+
	Misin05G173600	Chr05	58570657	58571145	+
	Misin05G173800	Chr05	58674613	58677132	+
	Misin05G173900	Chr05	58791197	58792423	-
	Misin05G174000	Chr05	58800708	58804773	-
	Misin05G174100	Chr05	58824363	58829870	+
	Misin05G174200	Chr05	58831268	58834665	+
	Misin05G174300	Chr05	58940035	58948838	+
	Misin05G174500	Chr05	58986621	58990932	-
	Sspon.03G0013180-2B	Chr03	46304362	46304369	-
Clade B	Sspon.02G0046920-1C	Chr02	9070407	9078678	-	Sacchaum spontaneum
	Sspon.02G0046910-1P	Chr02	9070465	9074516	+	BACs
	Sspon.02G0033720-2C	Chr02	9124601	9125786	+	Miscanthus sinensis
	Sspon.02G0003040-1P	Chr02	9171272	9173428	+	Sorghum bicolor
	Sspon.02G0003020-2P	Chr02	9175853	9178470	+
	Sspon.02G0003020-1P	Chr02	10045342	10045644	+
	Sspon.02G0003060-1A	Chr02	10111647	10112048	+
	Sspon.02G0046970-1C	Chr02	9732416	9733643	-
	Sspon.02G0046980-1P	Chr02	9737493	9738863	+
	Sspon.02G0003000-1A	Chr02	10025786	10026280	-
	Sspon.02G0003010-1A	Chr02	10039472	10041925	-
	Sspon.02G0003050-1A	Chr02	10099801	10100473	+
	Sspon.02G0003090-1A	Chr02	10127443	10137947	+
	Sspon.02G0003010-1P	Chr02	10138326	10141674	+
	Sobic.002G385400	Chr02	74006901	74009694	-
	Sobic.002G384100	Chr02	73946693	73947263	+
	Sobic.002G383900	Chr02	73937660	73940092	+
	Sobic.002G383800	Chr02	73931275	73935787	+
	Sobic.002G383700	Chr02	73925232	73930261	+
	Sobic.002G383600	Chr02	73916755	73923871	+
Clade C	Seita.2G337300	scaffold_2	42149654	42150979	-	Setaria italica
	Seita.2G337400	scaffold_2	42152822	42155254	+	Setaria viridis
	Seita.2G337500	scaffold_2	42156090	42157138	+	Cenchrus americanus
	Seita.2G337700	scaffold_2	42167519	42169465	-
	Seita.2G337900	scaffold_2	42184183	42186013	+
	Seita.2G338000	scaffold_2
	Seita.2G338100	scaffold_2
	Seita.2G338200	scaffold_2
	Seita.2G338600	scaffold_2
	Seita.2G338700	scaffold_2
	Seita.2G338800	scaffold_2
	Seita.4G199800					Setaria otalica
	Seita.4G199900					Setaria viridis
	Seita.4G200100					Cenchrus americanus
	Seita.4G200200
	Seita.4G200300
	Seita.4G200400
	Seita.4G200600
	LOC_Os07g34390					Panicum virgatum
	LOC_Os07g34580					Panicum hallii var. hallii
	LOC_Os07g34589					Eleusine coracana
	LOC_Os07g34620					Oropetium thomameum
						Oryza sativa
						Oryza brachyantha

## Sheet: Clade-A_BACs
	SHCRBa_021_C22			SHCRBa_107_N16			SHCRBa_149_E16			SHCRBa_086_A19			SHCRBa_134_H07			SHCRBa_045_A10			SHCRBa_108_C04			SHCRBa_093_A03			SHCRBa_145_O03
	Start	End	Strand	Start	End	Strand	Start	End	Strand	Start	End	Strand	Start	End	Strand	Start	End	Strand	Start	End	Strand	Start	End	Strand	Start	End	Strand
Misin05G172600
Misin05G172700
Misin05G172800
Misin05G172900
Misin05G173100	133298	130880		50579	52997		159007	156590		47552	45134		50263	52681											133298	130880
Misin05G173200							154008	153046
Misin05G173300
Misin05G173400
Misin05G173600
Misin05G173800
Misin05G173900
Misin05G174000
Misin05G174100
Misin05G174200
Misin05G174300
Misin05G174500
